# Supplementary material for: Fabrication of solution-processable OFET memory using a nano-floating gate based on a phthalocyanine-cored star-shaped polymer
Source: Royal Society of Chemistry journal article supplement (doi:10.1039/d1ma01081f), 2022-01-01
Supplement: d1ma01081f1.pdf [file d1ma01081f1.pdf]

Supporting Information

**Fabrication of solution-processable OFET memory using a nano-floating gate based on phthalocyanine-cored star-shaped polymer**

Junko Aimi,\* Takeshi Yasuda, Chih-Feng Huang, Masafumi Yoshio, and Wen-Chang Chen

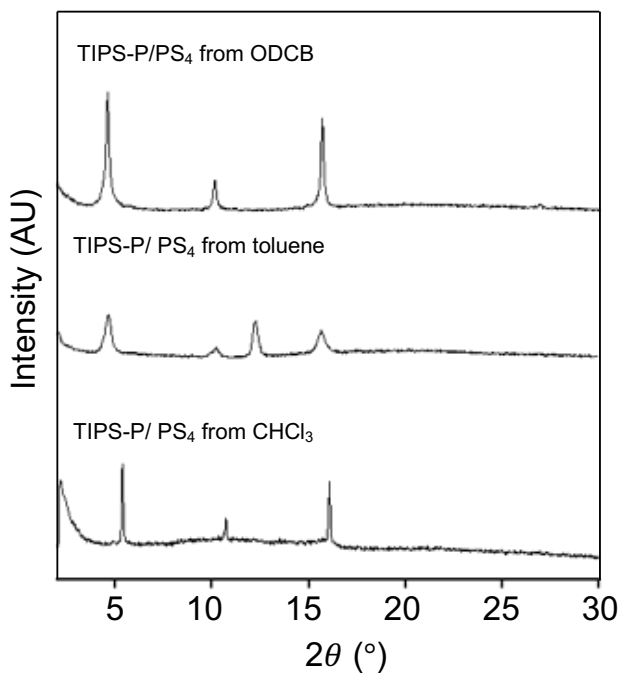

**Figure S1.** XRD profiles of TIPS-pentacene/PS<sub>4</sub> blend films coated from various solvents.

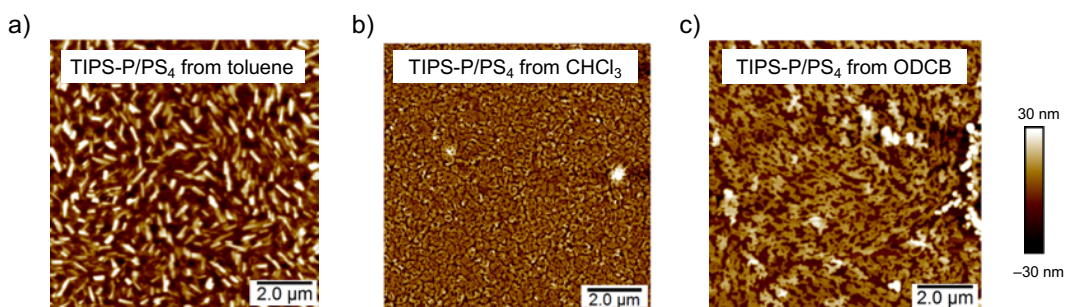

**Figure S2.** AFM height images of TIPS-pentacene/PS<sub>4</sub> blend films coated from various solvents.

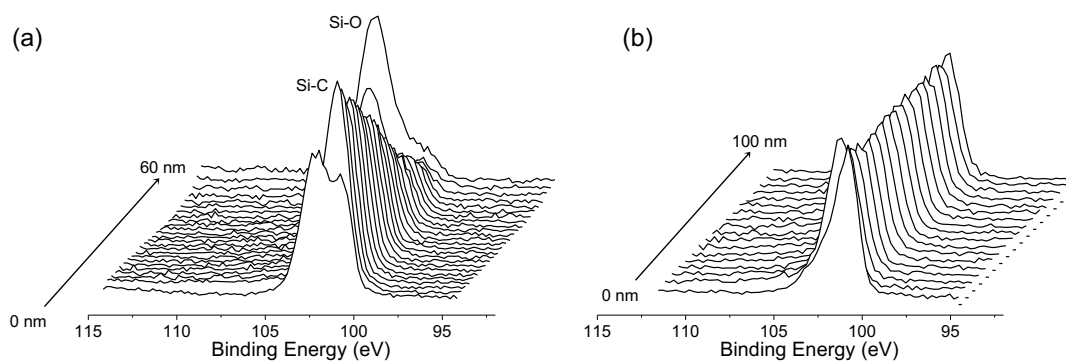

**Figure S3.** XPS spectral changes of the peak of Si 2*p* during depth profiles on TIPS-pentacene/CuSP blend films spin-coated from ODCB (a) and CHCl<sub>3</sub> (b) solutions.

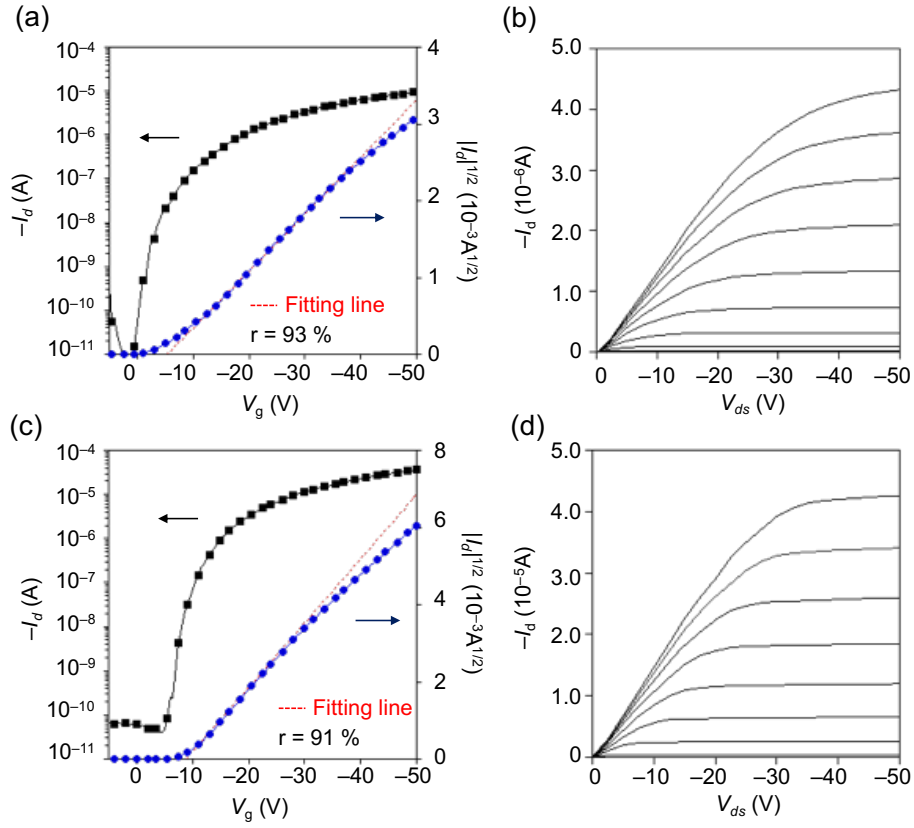

**Figure S4.** Typical transfer characteristics and output characteristics for OFET devices with the blend films of TIPS-pentacene/CuSP (a, b) and TIPS-pentacene/PS<sub>4</sub> (c, d) spin-coated from ODCB solutions.

In order to evaluate the validity of the effective saturation mobility ( $\mu_{\text{eff}}$ ) considering the nonlinearity of the transfer characteristics of OFET, the reliability factor ( $r$ ) for the effective mobility was calculated using the following equation (1):

$$r = \left( \frac{\sqrt{|I_D|V_{\text{max}}} - \sqrt{|I_D|V_{\text{th}}}}{|V_{\text{max}} - V_{\text{th}}|} \right)^2 \bigg/ \left( \frac{\partial \sqrt{|I_D|}}{\partial |G|} \right)_{\text{claimed}}^2 \quad (1)$$

where  $V_{\text{max}}$  and  $V_{\text{th}}$  are the maximum gate voltage and the threshold voltage, respectively, and  $|I_D|V_{\text{th}}$  are the source currents and at  $V_{\text{max}}$  and  $V_{\text{th}}$ , respectively.

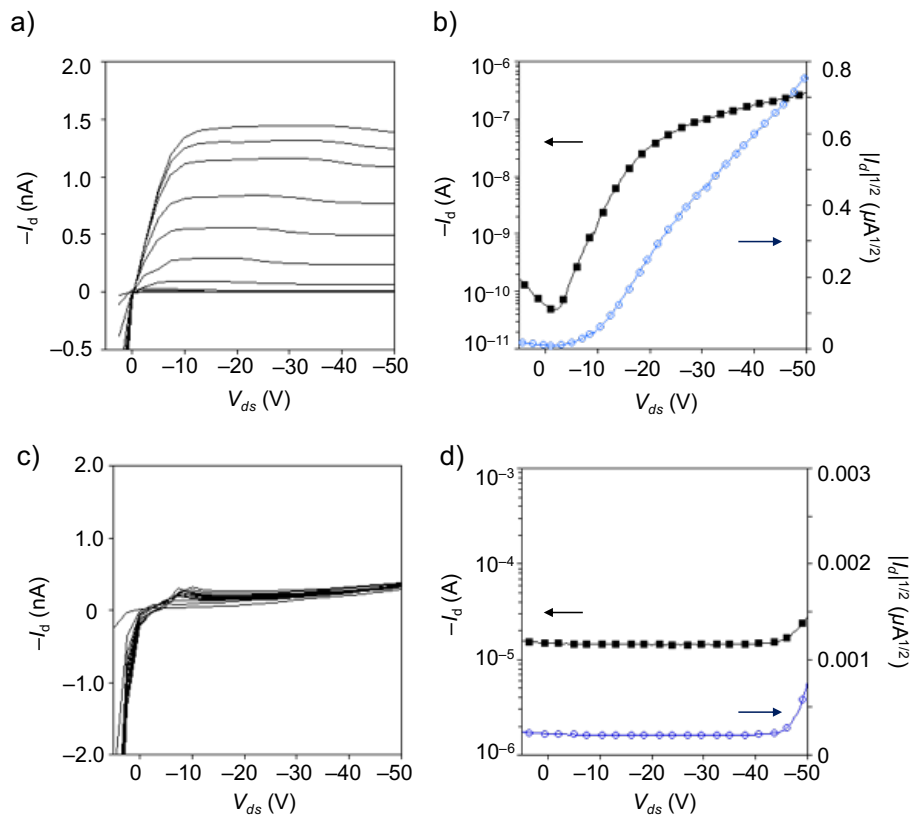

**Figure S5.** Typical output and transfer characteristics for OFET devices with the blend films of TIPS-pentacene/CuSP coated from toluene (a, b) and  $\text{CHCl}_3$  (c, d) solutions.

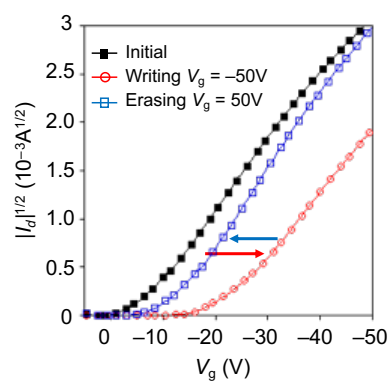

**Figure S6.** The linear plots of square root of drain-to-source current vs gate bias of OFET device with the blend film of TIPS-pentacene/CuSP spin-coated from ODCB solutions.

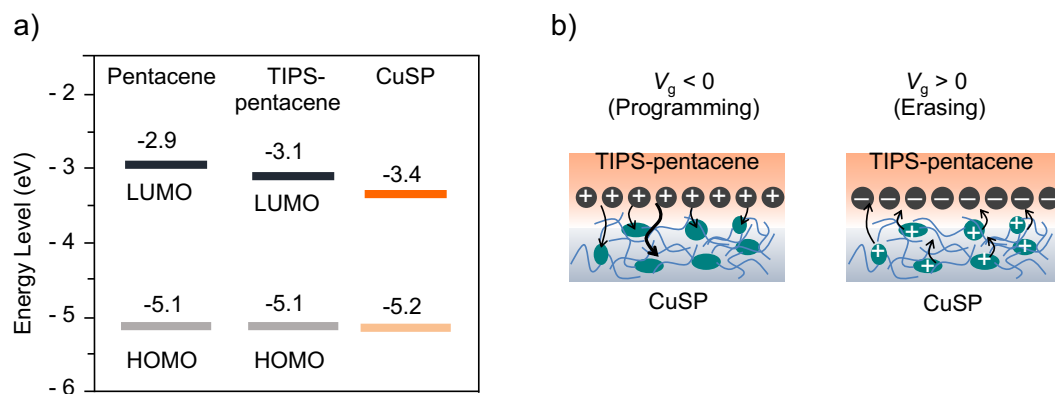

**Figure S7.** (a) Energy levels diagrams of organic semiconductors and CuSP. (b) Proposed mechanism of the memory devices with a phase-separated TIPS-pentacene/CuSP blend layer.
